# Supplementary material for: Metabolite Profiling in the Liver, Plasma and Milk of Dairy Cows Exposed to Tansy Ragwort (Senecio jacobae) Pyrrolizidine Alkaloids
Source: MDPI journal article supplement (doi:10.3390/toxins15100601), 2023-10-06
Supplement: s1 [file s1]

# Supplementary Materials: Metabolite Profiling in the Liver, Plasma and Milk of Dairy Cows Exposed to Tansy Ragwort (*Senecio jacobae*) Pyrrolizidine Alkaloids

A

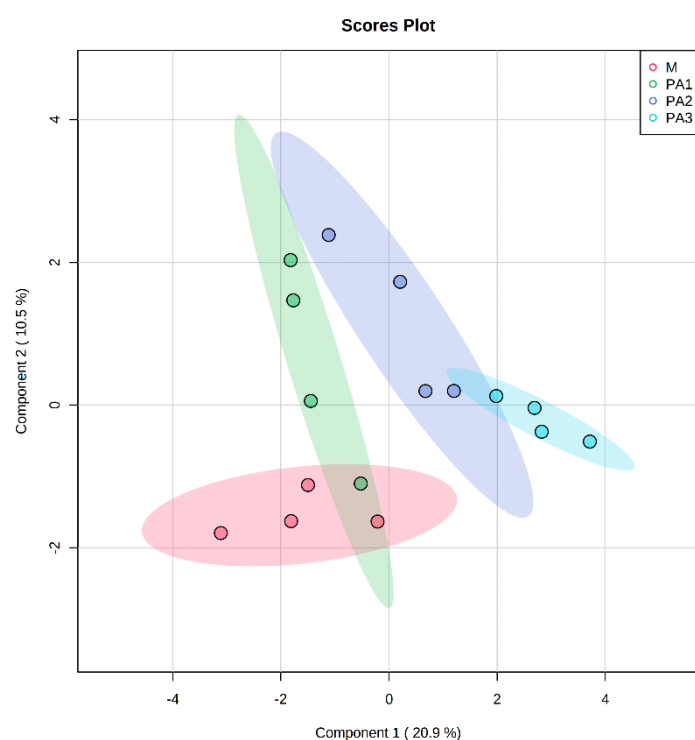

B

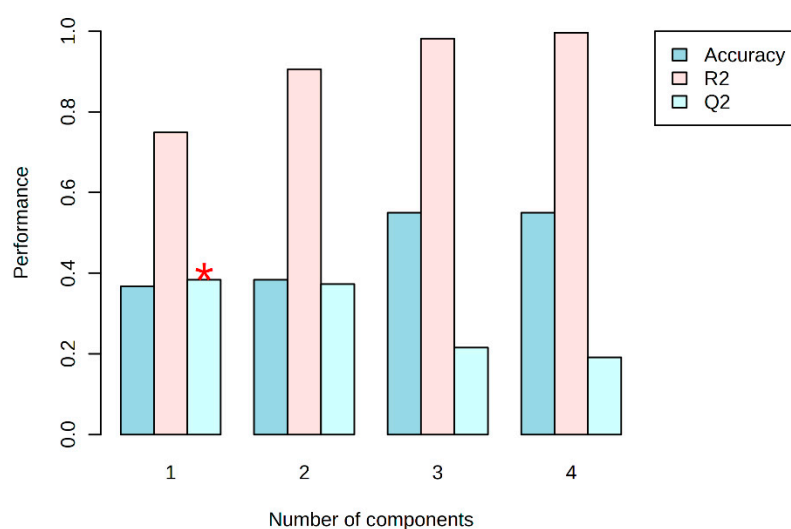

**Figure S1** Partial least square discriminant analysis (PLS-DA, (A) and cross-validation metrics Q2 (B)) of **liver** metabolite profile in dairy cows treated with different concentrations of pyrrolizidine alkaloids (M = Control, PA1 = 0.47 mg PA/kg body weight/day, PA2 = 0.95 mg PA/kg body weight/day, PA3 = 1.91 mg/kg body weight/day).

**A**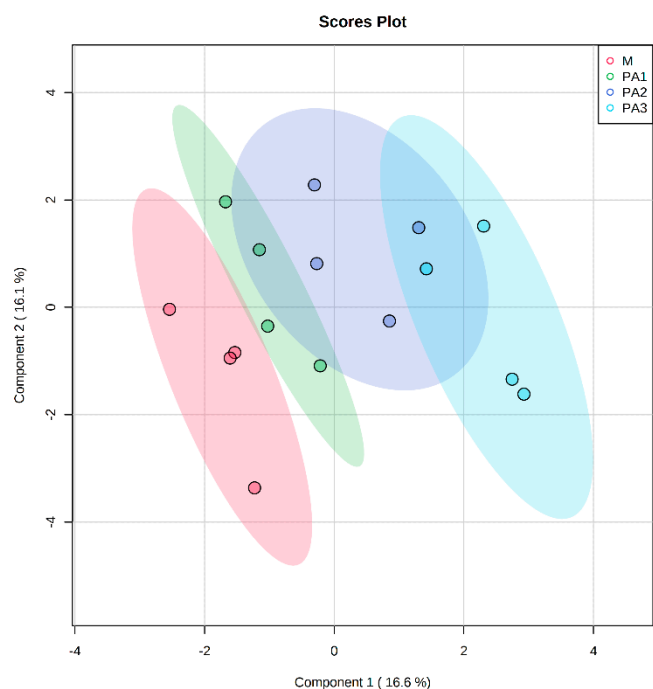**B**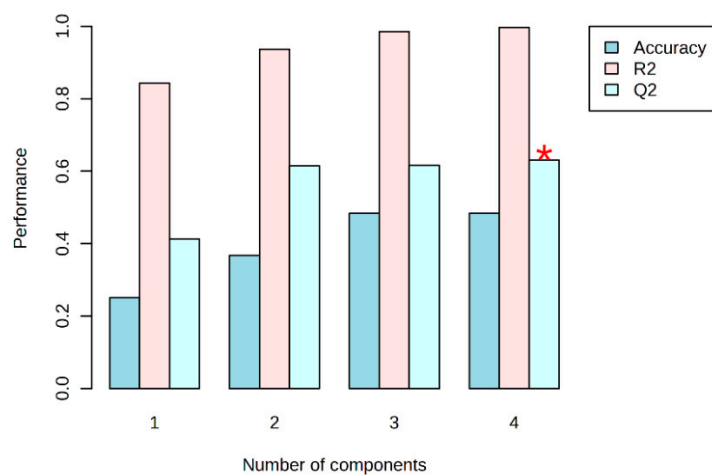

**Figure S2** Partial least square discriminant analysis (PLS-DA, (A) and cross validation metrics Q2 (B)) of **plasma** metabolite profile in dairy cows treated with different concentrations of pyrrolizidine alkaloids (M = Control, PA1 = 0.47 mg PA/kg body weight/day, PA2 = 0.95 mg PA/kg body weight/day, PA3 = 1.91 mg/kg body weight/day).

**A**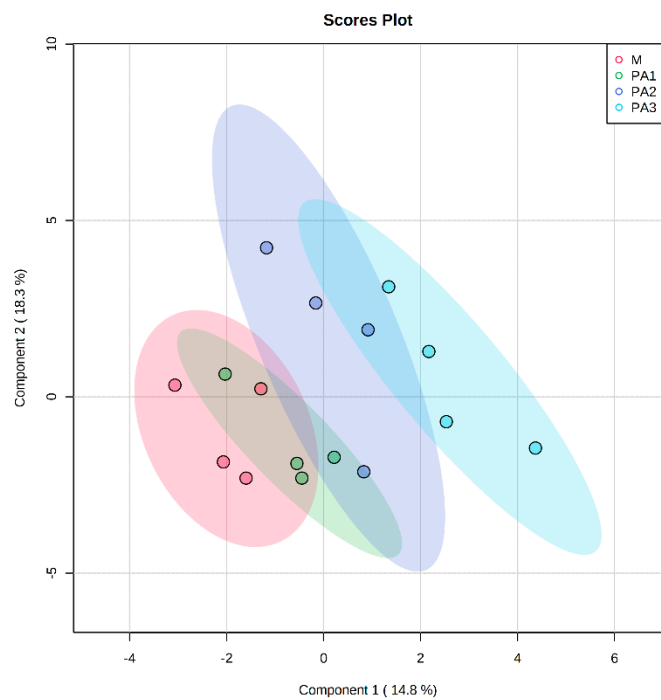**B**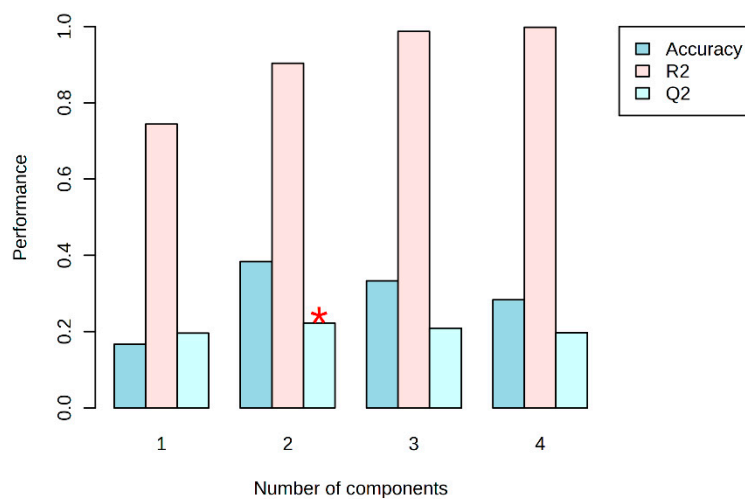

**Figure S3** Partial least square discriminant analysis (PLS-DA, (A) and cross validation metrics Q2 (B)) of **milk** metabolite profile in dairy cows treated with different concentrations of pyrrolizidine alkaloids (M = Control, PA1 = 0.47 mg PA/kg body weight/day, PA2 = 0.95 mg PA/kg body weight/day, PA3 = 1.91 mg/kg body weight/day).
